# Supplementary material for: Green synthesis of Mesona Blumes gum capped silver nanoparticles and their antioxidant, antibacterial and catalytic studies
Source: Royal Society of Chemistry journal article supplement (doi:10.1039/d3ma00091e), 2023-01-01
Supplement: d3ma00091e1.pdf [file d3ma00091e1.pdf]

## **Antioxidant, antibacterial and catalytic properties of *Mesona Blumes* gum stabilized Silver Nanoparticles**

Walaa Abdullah Sulaiman Al Yahyai<sup>a</sup>, Aya Ali Sulaiman Al Isai<sup>a</sup>, Mohammed F Alotibi<sup>b</sup>, Bhagavanth Reddy G<sup>c</sup>, Mohammed Al-Abri<sup>d,e</sup>, Babu Pejjai<sup>f</sup>, Nagaraju Devunuri<sup>g</sup>, Nadavala Siva Kumar<sup>h</sup>, Ahmed S. Al-Fatesh<sup>h</sup>, Ahmed I. Osman<sup>i\*</sup>, and Kondaiah Seku<sup>a\*</sup>

<sup>a</sup>Department of Engineering, Civil Section, University of Technology and Applied Sciences-Shinas, Sultanate of Oman

<sup>b</sup>Institute of Refining and Petrochemicals Technologies, King Abdulaziz City for Science and Technology (KACST), P.O. Box 6086, Riyadh 11442, Kingdom of Saudi Arabia

<sup>c</sup>Department of Chemistry, Palamuru University PG Centre, Wanaparthy, Telangana, Hyderabad, India

<sup>d</sup>Nanotechnology Research Center, Sultan Qaboos University, Muscat, Oman

<sup>e</sup>Department of Petroleum and Chemical Engineering, College of Engineering, Sultan Qaboos University, Muscat, Oman

<sup>f</sup>Department of Physics, Sri Venkateswara College of Engineering, Karakambadi Road, Tirupati, 517507, India

<sup>g</sup>Department of Chemistry, School of Applied Sciences & Humanities, Vignan's Foundation for Science, Technology & Research (VFSTR) Deemed University, Guntur, India

<sup>h</sup>Department of Chemical Engineering, College of Engineering, King Saud University, P.O. Box 800, Riyadh 11421, Saudi Arabia

<sup>i</sup>School of Chemistry and Chemical Engineering, Queen's University Belfast, Belfast BT9 5AG, Northern Ireland, UK

\*Corresponding author: E-mail address: [kondaiah.seku@utas.edu.om](mailto:kondaiah.seku@utas.edu.om) (Kondaiah Seku),  
[aosmanahmed01@qub.ac.uk](mailto:aosmanahmed01@qub.ac.uk) (Ahmed I. Osman)

## 2. Experimental works:

### 2.1. Catalytic reduction of CV and Rh-B dyes

A reaction mixture of Rh - B (5mL, 1mM) and NaBH<sub>4</sub> (5mL, 10mM) was prepared in 20mL distilled water. About 3 mL of this solution was taken in a cuvette and 7mg of MB@AgNPs was added. The reduction of Rh-B was monitored using a UV-visible spectrophotometer [32]. A similar procedure was carried out for CV dye reduction.

### 2.2. Antioxidant activity of MB@AgNPs

DPPH assay was used to examine the antioxidant activity of synthesized AgNPs. The previously reported method was followed with a few modifications [33]. The AgNPs were prepared up to 60μL using various volumes (5,10, 15, 20 and 25μL) of AgNPs with dimethyl sulfoxide, and 205 ml of DPPH (0.15 mM) solution was added to each sample. The above reaction mixture was vigorously stirred for 40 minutes at room temperature. At 517 nm, absorbance measurements were made using DPPH as a blank and ascorbic acid as standard [30]. The following expression was used to estimate free radical scavenging activity:

$$DPPH \text{ scavenging effect } (\%) = \frac{A_0 - A_t}{A_0} \times 100$$

A<sub>0</sub> is the absorbance of control (standard) and A<sub>t</sub> is the absorbance of the sample.

### 2.6. Antibacterial activity of MB@AgNPs

To evaluate the antibacterial activity of MB@AgNPs, agar well diffusion was used. AgNPs were dissolved in the DMSO solvent. The antibacterial properties of MB@AgNPs were assessed against Gram-positive (*Staphylococcus aureus*) and Gram-negative bacteria (*Escherichia coli* & *Bacillus cereus*). Measured zones were compared to standard streptomycin (positive control) using the ruler scale procedure. A total of 100 litres of phase cultures were placed in a nutrient agar medium (beef extract, peptone, and agar) for bacterial culture. A sterile borer was used to create four wells in each Petri dish after solidification. MB@AgNPs

stabilized were loaded in three wells with 25, 50, 75 and 100 $\mu$ L concentrations (5 $\mu$ g/mL), respectively, and positive control was loaded with *streptomycin* (100  $\mu$ L). The Petri plates were incubated in an incubation chamber for 24 hours at 37°C. Zones of inhibition were measured with a ruler method.

### ***2.7. Characterization Techniques***

The formation of MB@AgNPs has been characterized using various techniques. UV-Visible spectrophotometer (Lab India UV-3200) was used for the identification of MB@AgNPs, and the dye reduction studies. FTIR spectral studies were carried out using Shimadzu IR Affinity-1. Rigaku Miniflex (powder XRD) was used to analyse the structure of synthesized MB@AgNPs. TEM (JEOL2000; ZEISS EVO instrument) was used to investigate the size and shape of MB@AgNPs.
